# Supplementary material for: Vorticity-divergence semi-Lagrangian global atmospheric model SL-AV20: dynamical core
Source: Copernicus journal article supplement (doi:10.5194/gmd-10-1961-2017), 2017-05-22
Supplement: Supplementary file [file gmd-10-1961-2017-supplement-title-page.pdf › gmd-10-1961-2017-supplement-title-page.pdf]

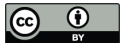

## *Supplement of*

# **Vorticity-divergence semi-Lagrangian global atmospheric model SL-AV20: dynamical core**

**Mikhail Tolstykh et al.**

*Correspondence to:* Vladimir Shashkin (vvshashkin@gmail.com)

- gmd-10-1961-2017-supplement-title-page.pdf
- SLAV20\_GMD\_data
  - BW\_400\_red
    - \* NAMELIST\_2A3
    - \* all.ctl
    - \* all.dat
  - BW\_400\_reg
    - \* NAMELIST\_2A3
    - \* all.ctl
    - \* all.dat
  - BW\_400\_varred
    - \* NAMELIST\_2A3
    - \* all.ctl
    - \* all.dat
  - HS\_red
    - \* NAMELIST\_2A3
    - \* ke.ctl
    - \* ke.dat
    - \* tt.dat
    - \* tz.ctl
    - \* tz.dat
    - \* uv.ctl
    - \* uv.dat
    - \* uz.ctl
    - \* uz.dat
    - \* vt.ctl

- \* vt.dat
- HS\_reg
  - \* NAMELIST\_2A3
  - \* ke.ctl
  - \* ke.dat
  - \* tt.ctl
  - \* tt.dat
  - \* tz.ctl
  - \* tz.dat
  - \* uv.ctl
  - \* uv.dat
  - \* uz.ctl
  - \* uz.dat
  - \* vt.ctl
  - \* vt.dat
- HS\_varred
  - \* NAMELIST\_2A3
  - \* ke.ctl
  - \* ke.dat
  - \* tt.dat
  - \* tz.ctl
  - \* tz.dat
  - \* uv.ctl
  - \* uv.dat
  - \* uz.ctl
  - \* uz.dat
  - \* vt.ctl
  - \* vt.dat
- grids
  - \* zz1600\_1005\_45.dat
  - \* zz1600\_1007\_45.dat
  - \* zz1600\_101\_45.dat
  - \* zz1600\_101\_45n.dat
  - \* zz400\_102.dat
  - \* zz400\_102\_40.dat
  - \* zz400\_102c.dat
  - \* zz400\_102sp.dat
  - \* zz400\_const\_red29.dat
  - \* zz800\_102\_10.dat
  - \* zz800\_102\_40.dat
  - \* zz800\_102\_43s.dat
  - \* zz\_250x400\_00\_vp102\_01\_gg2out.dat
  - \* zz\_250x400\_00\_vp105\_01\_gg2out.dat
  - \* zz\_250x400\_00\_vp11\_01\_gg2out.dat
  - \* zz\_250x400\_10\_01\_gg2out.dat
  - \* zz\_250x400\_20\_01\_gg2out.dat
  - \* zz\_250x400\_30\_01\_gg2out.dat

- \* zz\_500x800\_10\_01\_gg2out.dat
- \* zz\_500x800\_20\_01\_gg2out.dat
- \* zz\_500x800\_30\_01\_gg2out.dat
- \* zz\_865x1600\_10\_01\_gg2out.dat
- \* zz\_865x1600\_20\_01\_gg2out.dat
- \* zz\_865x1600\_30\_01\_gg2out.dat
- mirw\_reg
  - \* NAMELIST\_2A3
  - \* all.ctf
  - \* all.dat

The copyright of individual parts of the supplement might differ from the CC-BY 3.0 licence.
